# Supplementary material for: An Accurate, Rapid and Cost-Effective Method for T-nos Detection Based on CRISPR/Cas12a
Source: MDPI journal article supplement (doi:10.3390/foods12030615), 2023-02-01
Supplement: s1 [file s1]

## Supplementary data

**Table S1.** The list of all used sequences in this study.

| Primer name       | Sequence (5'-3')                          |
|-------------------|-------------------------------------------|
| ssDNA-FQ reporter | FAM-TTTTTTTTTTTT-BHQ1                     |
| crRNA-NOS 1       | UAAUUUCUACUCUUGUAGAUAAUACGCGAUAGAAAACAAA  |
| crRNA-NOS 2       | UAAUUUCUACUCUUGUAGAUUCUGUUGAAUUACGUUAAGCA |
| crRNA-NOS 3       | UAAUUUCUACUCUUGUAGAUUGGCAAUAAAGUUUCUUAAGA |
| NOS-QF_SN         | TTGGCAATAAAGTTTCTTAAGATTGAAT              |
| NOS-QR_SN         | ACATGCTTAACGTAATTCAACAGAAATT              |
| NOS-QP_SN         | 6-FAM-CTGTTGCCGGTCTTGCGATGATTATCAT-BHQ-1  |
| NOS-F1            | GAATCCTGTTGCCGGTCTTG                      |
| NOS-R1            | TTATCCTAGTTTGCGCGCTA                      |
| NOS-F2            | ATCGTTCAAACATTTGGCA                       |
| NOS-R2            | ATTGCGGGACTCTAATCATA                      |

**Table S2.** Ct values of qPCR for T-nos detection from 11 soybean DNA samples.

| Samples  | NTC        | GM1        | GM2        | GM3        | GM4       | GM5        | GM6        |
|----------|------------|------------|------------|------------|-----------|------------|------------|
| CT value | -          | 24.37±0.02 | 30.28±0.01 | 31.88±0.11 | 30.69±0.1 | 32.28±0.04 | 24.83±0.04 |
| Sample   | GM7        | Non-GM1    | Non-GM2    | Non-GM3    | Non-GM4   |            |            |
| CT value | 29.53±0.05 | -          | -          | -          | -         |            |            |

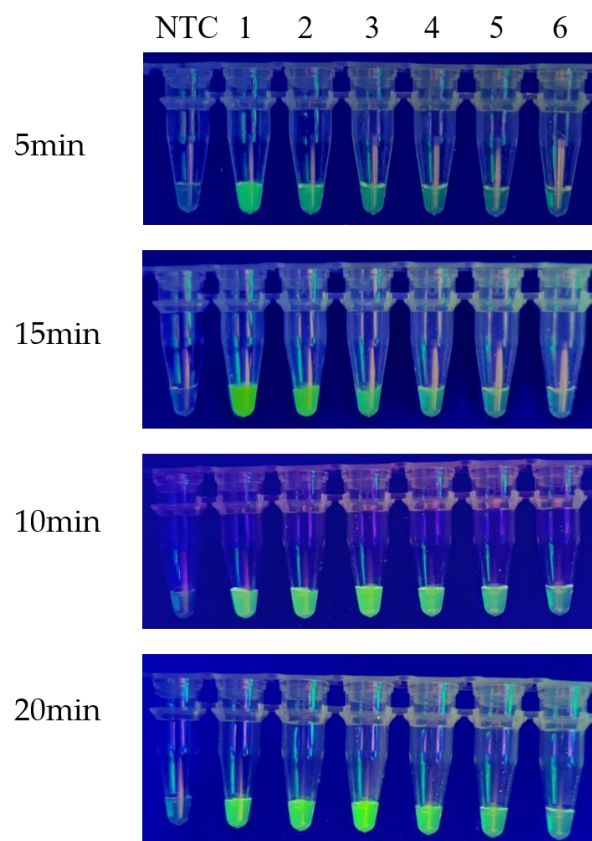

**Figure S1.** Endpoint fluorescence graphs for the T-nos detection with various incubation time (5, 10, 15 and 20 min) at 37 °C. No obvious change in visual fluorescence after incubation for 15 minutes or 20 minutes.

NTC, no template control; Lanes 1–6,  $9 \times 10^4$ ,  $1.8 \times 10^4$ ,  $3.6 \times 10^3$ ,  $7.2 \times 10^2$ , 144, and 29 copies/ $\mu$ L plasmid.

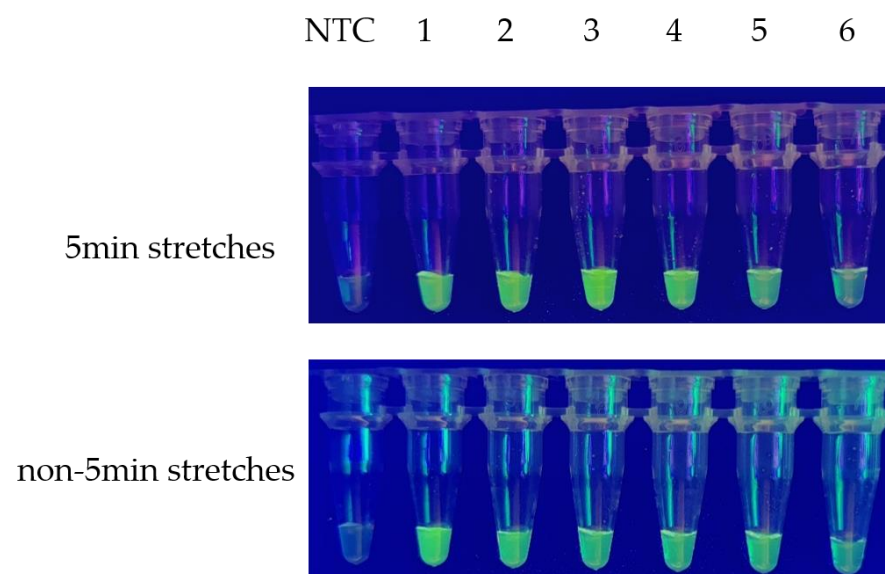

**Figure S2.** Effect of PCR with or without the final 5 min extension on CRISPR reaction. NTC, no template control; Lanes 1–6,  $9 \times 10^4$ ,  $1.8 \times 10^4$ ,  $3.6 \times 10^3$ ,  $7.2 \times 10^2$ , 144, and 29 copies/ $\mu\text{L}$  plasmid.

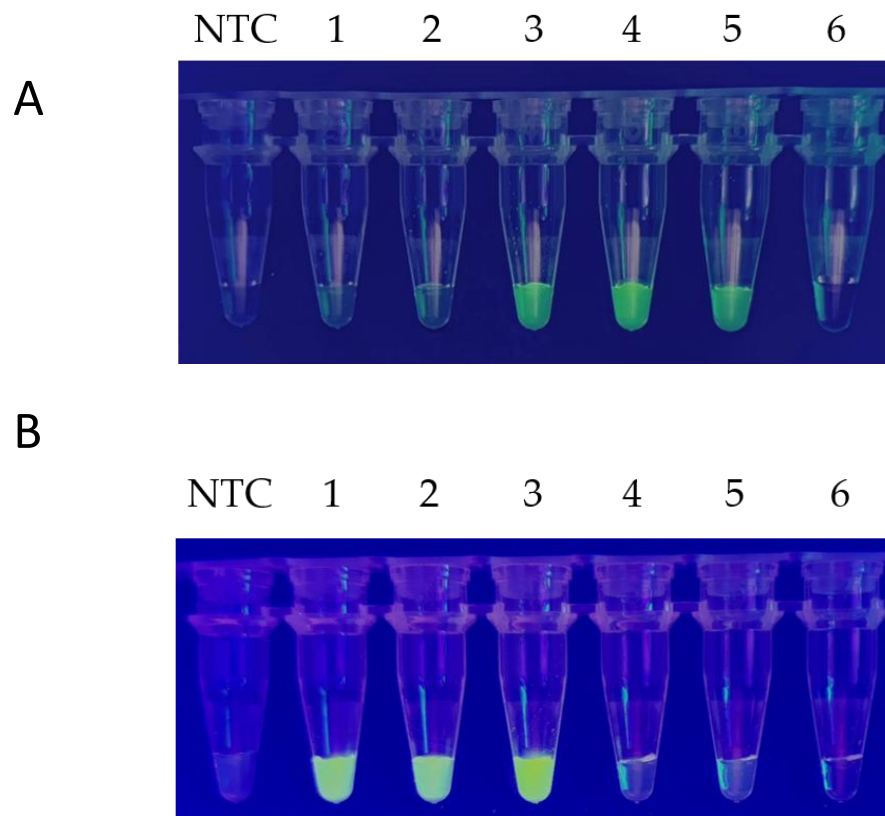

**Figure S3.** Specificity evaluation of the CRISPR/Cas12a assay for T-nos detection.  
A: 1-2: CaMV 35S promoter, T-35S terminator; 3-5: Three transgenic corn containing T-nos samples; 6: non-NOS GM soybean (MON89788).  
B: 1-3: Three different DNA concentrations of GM soybean ZUTS-33; 4-6: Three different DNA concentrations of non-GM soybeans.

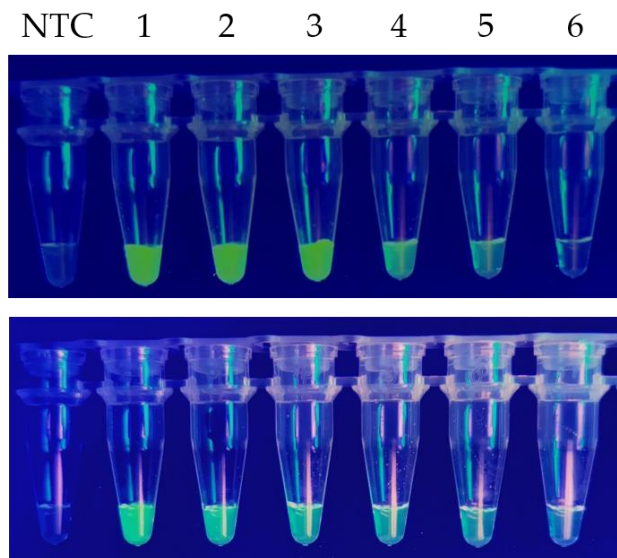

**Figure S4.** Two other repetitions based on sensitivity test.
